# Supplementary material
Source: ML conference proceedings conference paper supplement (https://proceedings.mlr.press/v119/shuvo20a.html)
Supplement: Supplementary file [file shuvo20a-supp.pdf]

---

# Supplementary File for “A Markov Decision Process Model for Socio-Economic Systems Impacted by Climate Change”

---

Anonymous Authors<sup>1</sup>

## Proof of Theorem 1

Nondecreasing and Concave:

We will first show that if  $V(s_n, \ell_n)$  is nondecreasing and concave in  $\ell_n$ , then so is

$$F_m(s_n, \ell_n) = \mathbb{E}[m\alpha - \beta y_n + z_n + a_g V(s_{n-1} + m, \ell_{n-1} + r_n)],$$

for  $m = 0, 1, \dots, q$ . Assume

- $\frac{\partial}{\partial \ell_n} V(s_n, \ell_n) \geq 0$  (nondecreasing),
- $\frac{\partial^2}{\partial \ell_n^2} V(s_n, \ell_n) < 0$  (concavity).

Using the nondecreasing monotonicity of  $V(s_n, \ell_n)$  we can write

$$\frac{\partial}{\partial \ell_n} F_m(s_n, \ell_n) = \frac{\eta a \ell_{n-1}^{a-1}}{(1-k)s_{n-1}^b} + a_g \mathbb{E} \left[ \frac{\partial}{\partial \ell_n} V(s_n, \ell_n) \right] \geq 0,$$

where the derivative can be brought inside the integral due to the monotone convergence theorem. Since  $0 < a < 1$ , for the second derivative we have

$$\frac{\partial^2}{\partial \ell_n^2} F_m(s_n, \ell_n) = \frac{\eta a(a-1)\ell_{n-1}^{a-2}}{(1-k)s_{n-1}^b} + a_g \mathbb{E} \left[ \frac{\partial^2}{\partial \ell_n^2} V(s_n, \ell_n) \right] < 0.$$

Hence, it is sufficient to show that  $V(s_n, \ell_n)$  is nondecreasing and concave.

Finding the value function iteratively (i.e., value iteration) is a common approach which is known to converge (Sutton & Barto, 2018):  $\lim_{i \rightarrow \infty} V_i(s, \ell) = V(s, \ell)$ . For brevity, we drop the time index from now on. We will next prove that  $V(s, \ell)$  is nondecreasing and concave iteratively. Initializing all the state values as zero, i.e.,  $V^0(s, \ell) = 0, \forall s, \ell$ , after the first iteration we get

$$\begin{aligned} V_1(s, \ell) &= \min_x \left\{ \mathbb{E}[\alpha x - \beta y(x, z) + z(s, \ell) + a_g V^0(s+x, \ell+r)] \right\}, \\ &= \mathbb{E}[z(s, \ell)] = \theta + \frac{\sigma}{1-k} = \theta + \frac{\eta \ell^a}{(1-k)s^b}, \end{aligned}$$

where we used the fact that  $\mathbb{E}[y] = 0$  when  $x = 0$  for all states. Differentiating with respect to  $\ell$ , we get

$$\begin{aligned} \frac{\partial}{\partial \ell} V_1(s, \ell) &= \eta a \frac{\ell^{a-1}}{(1-k)s^b} \geq 0, \quad \forall s, \\ \frac{\partial^2}{\partial \ell^2} V_1(s, \ell) &= \eta a(a-1) \frac{\ell^{a-2}}{(1-k)s^b} < 0, \quad \forall s, \end{aligned} \tag{S1}$$

---

<sup>1</sup>Anonymous Institution, Anonymous City, Anonymous Region, Anonymous Country. Correspondence to: Anonymous Author <anon.email@domain.com>.

since  $\eta > 0, a \in (0, 1), b > 0, k < 0$ . Thus,  $V_1(s, \ell)$  is nondecreasing and concave in  $\ell$  for all  $s$ . Next, value function after the second iteration becomes

$$\begin{aligned} V_2(s, \ell) &= \min_x \left\{ \mathbb{E}[\alpha x - \beta y(x, z) + z(s, \ell) + a_g V_1(s + x, \ell + r)] \right\} \\ &= \min_x \left\{ \mathbb{E}[\alpha x - \beta y(x, z)] + \theta + \frac{\eta \ell^a}{(1-k)s^b} + a_g \theta + a_g \mathbb{E} \left[ \frac{\eta(\ell + r)^a}{(1-k)(s+x)^b} \right] \right\}. \end{aligned}$$

Denoting the optimum action with  $\bar{x}$  we will show that  $V_2(s, \ell)$  is nondecreasing and concave for any  $\bar{x}$ . Moreover, the pointwise minimum of nondecreasing and concave functions is also nondecreasing and concave. The residents' probability of support  $\mathbb{E}[y(x, z)]$  depends on past values of  $x$  and  $z$ , but not  $\ell$  directly, so taking the derivative with respect to  $\ell$  we get

$$\begin{aligned} \frac{\partial}{\partial \ell} V_2(s, \ell) &= \frac{\partial}{\partial \ell} \left\{ \frac{\eta \ell^a}{(1-k)s^b} + a_g \frac{\eta \mathbb{E}[(\ell + r)^a]}{(1-k)(s + \bar{x})^b} \right\} \\ &= \eta a \frac{\ell^{a-1}}{(1-k)s^b} + a_g \eta a \frac{\mathbb{E}[(\ell + r)^{a-1}]}{(1-k)(s + \bar{x})^b} \geq 0, \quad \forall s \\ \frac{\partial^2}{\partial \ell^2} V_2(s, \ell) &= \eta a(a-1) \frac{\ell^{a-2}}{(1-k)s^b} + a_g \eta a(a-1) \frac{\mathbb{E}[(\ell + r)^{a-2}]}{(1-k)(s + \bar{x})^b} < 0, \quad \forall s. \end{aligned}$$

Hence,  $V_2(s, \ell)$  is nondecreasing and concave. Now, for any  $i$ , given that  $V_{i-1}(s, \ell)$  is nondecreasing and concave, we can write

$$\begin{aligned} \frac{\partial}{\partial \ell} V_i(s, \ell) &= \eta a \frac{\ell^{a-1}}{(1-k)s^b} + a_g \mathbb{E} \left[ \frac{\partial}{\partial \ell} V_{i-1}(s + \bar{x}, \ell) \right] \geq 0, \quad \forall s \\ \frac{\partial^2}{\partial \ell^2} V_i(s, \ell) &= \eta a(a-1) \frac{\ell^{a-2}}{(1-k)s^b} + a_g \mathbb{E} \left[ \frac{\partial^2}{\partial \ell^2} V_{i-1}(s + \bar{x}, \ell) \right] < 0, \quad \forall s. \end{aligned} \tag{S2}$$

Consequently, by mathematical induction,  $V(s, \ell)$  is nondecreasing and concave.

### Comparison of Derivatives:

Similarly, if we show that

$$\frac{\partial}{\partial \ell} V(s + m, \ell) < \frac{\partial}{\partial \ell} V(s + m - 1, \ell),$$

we can conclude that  $\frac{\partial}{\partial \ell} F_m(s, \ell) < \frac{\partial}{\partial \ell} F_{m-1}(s, \ell)$  since

$$\begin{aligned} \frac{\partial}{\partial \ell_n} F_m(s_n, \ell_n) &= \frac{\eta a \ell_{n-1}^{a-1}}{(1-k)s_{n-1}^b} + a_g \mathbb{E} \left[ \frac{\partial}{\partial \ell_n} V(s_{n-1} + m, \ell_n) \right] \\ \frac{\partial}{\partial \ell_n} F_{m-1}(s_n, \ell_n) &= \frac{\eta a \ell_{n-1}^{a-1}}{(1-k)s_{n-1}^b} + a_g \mathbb{E} \left[ \frac{\partial}{\partial \ell_n} V(s_{n-1} + m - 1, \ell_n) \right]. \end{aligned}$$

Starting again with  $V_0(s, \ell) = 0, \forall s, \ell$ , from (S1) we can write the following inequality for the first iteration

$$\frac{\partial}{\partial \ell} V_1(s + m, \ell) = \eta a \frac{\ell^{a-1}}{(1-k)(s+m)^b} < \frac{\partial}{\partial \ell} V_1(s + m - 1, \ell) = \eta a \frac{\ell^{a-1}}{(1-k)(s+m-1)^b}.$$

For any  $i$ , given that  $\frac{\partial}{\partial \ell} V_{i-1}(s + m, \ell) < \frac{\partial}{\partial \ell} V_{i-1}(s + m - 1, \ell)$ , from (S2) we have

$$\begin{aligned} \frac{\partial}{\partial \ell} V_i(s + m, \ell) &= \eta a \frac{\ell^{a-1}}{(1-k)(s+m)^b} + a_g \mathbb{E} \left[ \frac{\partial}{\partial \ell} V_{i-1}(s + m + \bar{x}, \ell) \right] < \\ &\frac{\partial}{\partial \ell} V_i(s + m - 1, \ell) = \eta a \frac{\ell^{a-1}}{(1-k)(s+m-1)^b} + a_g \mathbb{E} \left[ \frac{\partial}{\partial \ell} V_{i-1}(s + m - 1 + \bar{x}, \ell) \right]. \end{aligned}$$

As a result, by mathematical induction we can conclude that  $\frac{\partial}{\partial \ell} V(s + m, \ell) < \frac{\partial}{\partial \ell} V(s + m - 1, \ell)$ .

## References

Sutton, R. S. and Barto, A. G. *Reinforcement learning: An introduction*. MIT press, 2018.
